# Supplementary material for: Estrogen-Inducible LncRNA BNAT1 Functions as a Modulator for Estrogen Receptor Signaling in Endocrine-Resistant Breast Cancer Cells
Source: MDPI journal article supplement (doi:10.3390/cells11223610), 2022-11-15
Supplement: s1 [file s1]

## Supplementary Materials

**A**

```
>hg19_dna range=chr21:46823721-46824412 strand=-
GGGCCAGCATCCTGAGCCCCACCTGCAGGCCCTGGGCGCTTTCCTCCTGG
CAGCTGTGCCCCCACCAGACCGGACCGCTCCCTGCAACCAGAGAGCCCTC
ACACCAGCAACACCCCCCAGCCTGCTCCCTCCTCGTGTGCGCGAAACTCA
TGGCACTGGCTTGACGGCTTTCTCTGAAACCCTC TGATTCCGCCTGGCCC
ATCCACACTGTCCCTTCCCGGCCAGGGCTCATCTCCTATGCCTGGACCAA
ACAGCGTAGTCTCCAGTCTCCC TGATCTCCCCACACGTGGCCCCACCCAT
CCTCTGAAGCAGCCCCAGGAGGCAGCAGTGACTTCACACTTCTAGTGCCC
GGCCCTCCCGGCCCTCCTCTCTGGGCTTGCTTGCC AGGGTCCTCCCAACC
TGACTGCTGCCTCCCACCTCCTCTCCGCCCTGGAGCTCTCCAGCCGAG
CCGCGGGGCTGCTTGGGATTCTCCTCTGCTGGCATCATCCCTGCCTGCC
TCAGCCTTCCAGGCCCAATCCTGCCCAGATCTCACCTCTTCCCGCCCAGC
CACCTGGTCGGGTCCCGACCAGCATCTGCCTCAAACCTGGAGTCCTTCC
CTGAGTGCTTGCGGTGCACTGTGAGGAAGGAAATCAATGTAAAGGATTAT
GACCCACATTTTTTAAAAATAAAAAGATTAAGGAGAACAGCA
```

**B**

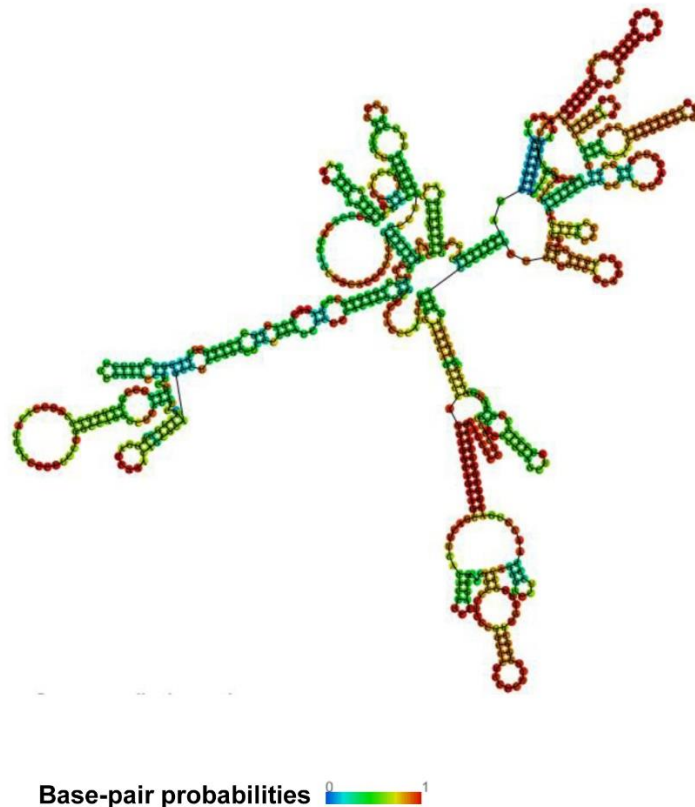

**Figure S1.** The sequence of lncRNA *BNAT1* and its putative secondary structure. **(A)** Sequence of *BNAT1* determined by RNA-seq for MCF7 cells. Highlighted bases in yellow and green correspond to a canonical ER binding motif as a transcription factor as defined by JASPAR database [<https://jaspar.genereg.net/>] and two consensus motifs for ER $\alpha$  as an RNA-binding protein as defined by Prof. Ruggero and colleagues [ref. 17 in the main text], respectively. **(B)** Putative secondary structure for *BNAT1*, estimated by the *in silico* analysis based on minimum free energy prediction in RNAfold web server operated by University of Vienna [<http://rna.tbi.univie.ac.at/cgi-bin/RNAWebSuite/RNAfold.cgi>].

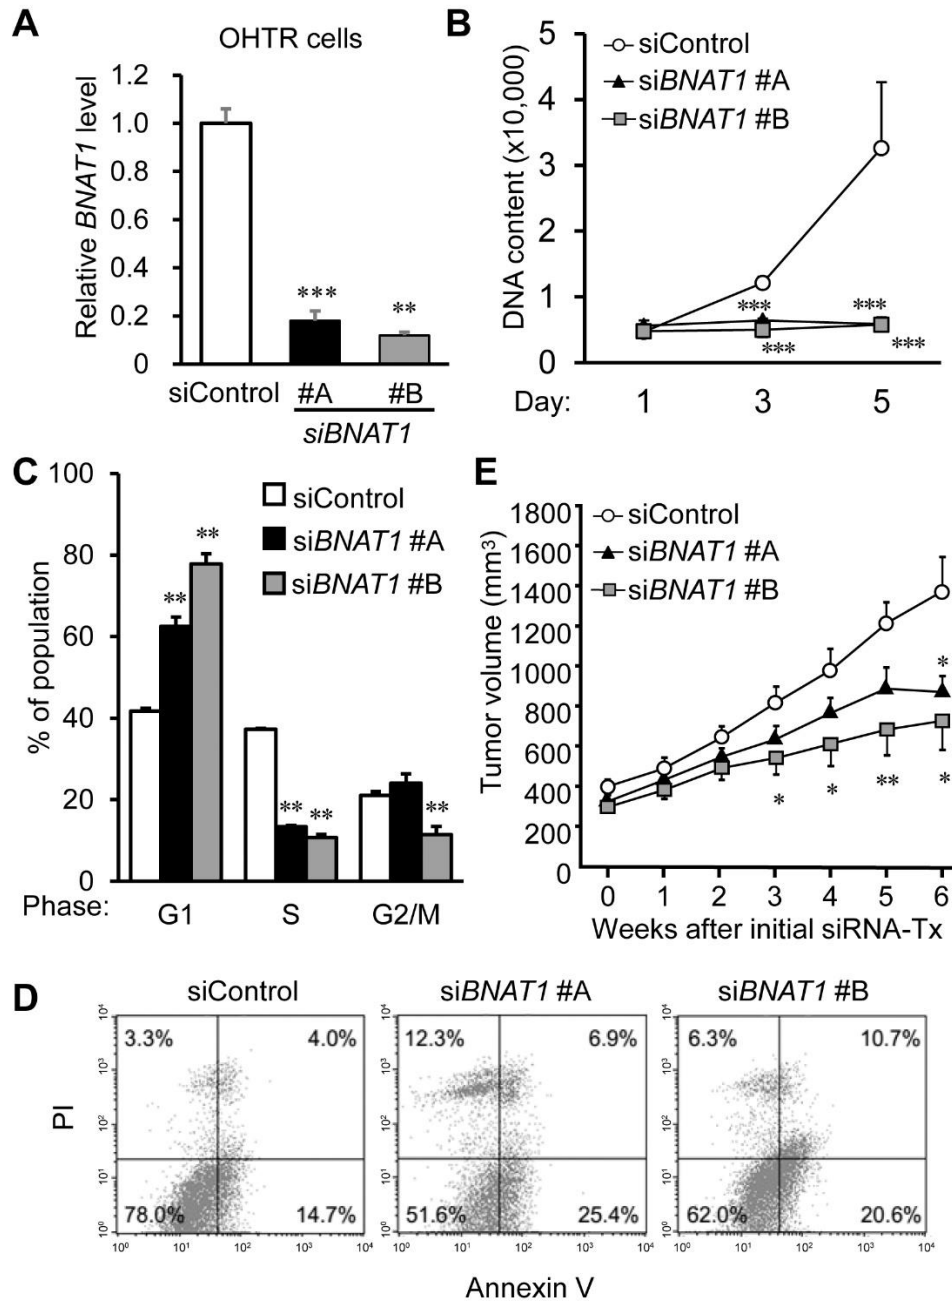

**Figure S2.** *BNAT1* silencing represses the viability and cell cycle progression, whereas promotes apoptosis of hormone-refractory breast cancer OHTR cells. (A) Knockdown efficiency of *BNAT1* siRNAs (siBNAT1s) #A and #B compared with control siRNA (siControl) in hormone-refractory OHTR cells analyzed by qRT-PCR (n = 3). (B) The viability of OHTR cells treated with indicated siRNAs, analyzed by DNA assay. Values are presented as means  $\pm$  SEM versus levels for siControl in each cell type (n = 5). (C) Cell cycle distribution of siRNA-treated OHTR cells stained with propidium iodide (PI) analyzed by flow cytometry. Percentages of cell populations in G1, S, and G2/M phases are shown (n = 3). (D) Percentages of annexin V-positive populations in OHTR cells treated with the indicated siRNAs, analyzed by flow cytometry (n = 3). (E) *BNAT1*-specific siRNAs inhibit *in vivo* tumor growth of hormone-refractory breast cancer cells. OHTR cells were injected into flanks of nude mice and the indicated siRNAs were injected twice weekly into the developed xenograft tumors (n = 7 for siControl and siBNAT1 #B groups and n = 9 for siBNAT1 #A group). Tumor volumes are presented as means  $\pm$  SEM. \*,  $p < 0.05$ ; \*\*,  $p < 0.01$ ; \*\*\*,  $p < 0.001$ .

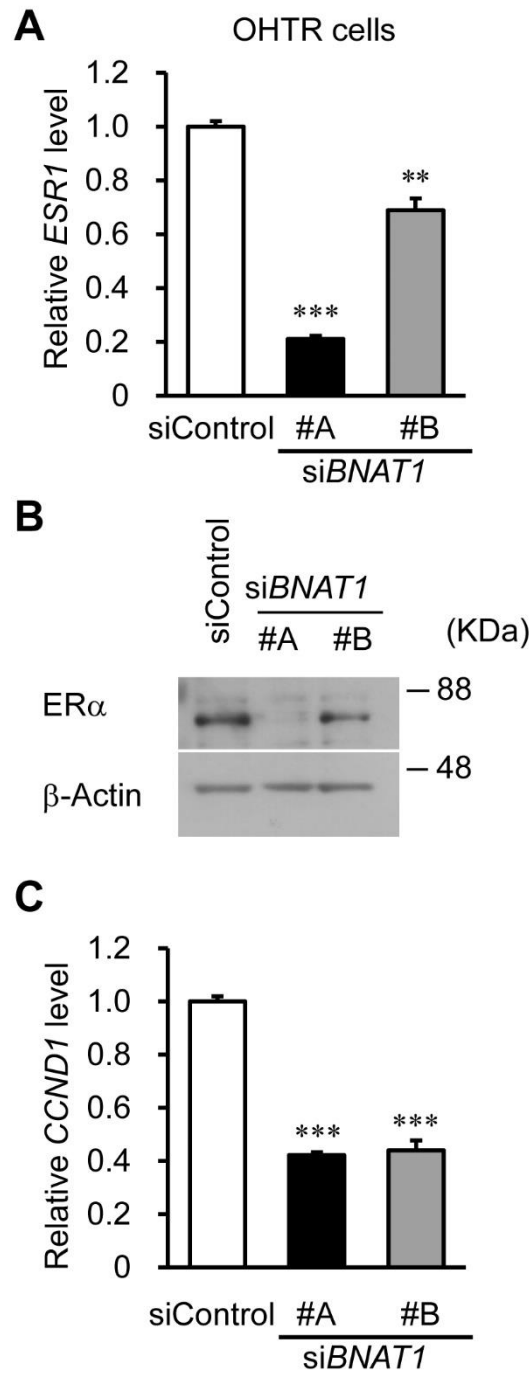

**Figure S3.** Effects of *BNAT1* silencing on the expression of *ERα* and its target gene *CCND1* in hormone-refractory OHTR cells. **(A)** Downregulation of *ESR1* expression in OHTR cells treated with siBNAT1s. Relative RNA levels are presented as mean fold changes  $\pm$  SEM versus levels for siControl ( $n=3$ ). **(B)** Immunoblotting of *ERα* protein in OHTR cells treated with siBNAT1s. **(C)** Effect of *BNAT1* silencing on *CCND1* level in OHTR cells. Relative RNA levels are presented as mean fold changes  $\pm$  SEM versus levels for siControl ( $n=3$ ). \*\*,  $p < 0.01$ ; \*\*\*,  $p < 0.001$ .

**Table S1.** Estrogen-inducible active enhancer clusters identified from a subgroup of ER $\alpha$ /acetylated histone H3K27 co-bound enhancers in MCF7 cells previously published in the literature [refs.6-8 in the main text]. These enhancers were shown to have following features: the association with estradiol (E<sub>2</sub>)-upregulated enhancer RNAs, high intensity of ER $\alpha$  binding, and close proximity to estrogen target genes. Among the original 1,248 E<sub>2</sub>-upregulated active enhancers, we focused on 66 clusters including at least 3 active enhancers per a region, with a distance between 2 adjacent enhancers  $\leq 25$  kb.

| Chr   | Start       | End         | Chr   | Start       | End         |
|-------|-------------|-------------|-------|-------------|-------------|
| chr1  | 16,934,849  | 16,941,132  | chr12 | 6,372,442   | 6,387,999   |
| chr1  | 42,325,987  | 42,334,136  | chr12 | 53,360,226  | 53,366,102  |
| chr1  | 202,075,557 | 202,101,968 | chr12 | 69,186,965  | 69,198,324  |
| chr1  | 207,046,219 | 207,083,229 | chr14 | 75,721,796  | 75,742,242  |
| chr2  | 11,638,754  | 11,672,797  | chr14 | 93,478,031  | 93,512,598  |
| chr2  | 100,226,367 | 100,253,406 | chr14 | 105,498,842 | 105,516,984 |
| chr2  | 216,844,387 | 216,847,609 | chr14 | 106,134,752 | 106,146,352 |
| chr3  | 14,712,421  | 14,718,803  | chr15 | 63,672,125  | 63,688,163  |
| chr3  | 107,705,503 | 107,725,311 | chr15 | 71,371,485  | 71,397,318  |
| chr3  | 150,440,610 | 150,481,106 | chr15 | 89,663,147  | 89,682,829  |
| chr3  | 170,038,368 | 170,061,984 | chr16 | 1,337,730   | 1,347,194   |
| chr3  | 193,546,271 | 193,586,766 | chr16 | 33,955,682  | 33,964,137  |
| chr3  | 193,855,480 | 193,877,028 | chr16 | 54,458,081  | 54,459,808  |
| chr4  | 77,483,480  | 77,491,497  | chr16 | 72,947,315  | 72,970,174  |
| chr5  | 55,749,953  | 55,776,290  | chr16 | 85,316,047  | 85,345,752  |
| chr5  | 66,510,961  | 66,532,904  | chr16 | 85,487,467  | 85,525,878  |
| chr6  | 11,047,050  | 11,067,846  | chr16 | 88,990,287  | 88,995,126  |
| chr6  | 39,234,599  | 39,243,507  | chr17 | 26,852,406  | 26,864,131  |
| chr6  | 125,519,136 | 125,526,509 | chr17 | 38,705,600  | 38,711,997  |
| chr8  | 37,448,210  | 37,456,380  | chr17 | 49,021,801  | 49,027,624  |
| chr8  | 67,424,590  | 67,435,001  | chr17 | 55,418,023  | 55,435,025  |
| chr8  | 102,475,038 | 102,515,536 | chr17 | 72,741,009  | 72,766,198  |
| chr8  | 128,801,087 | 128,813,288 | chr17 | 77,002,040  | 77,013,934  |
| chr8  | 128,872,114 | 128,883,110 | chr18 | 46,501,024  | 46,523,573  |
| chr8  | 129,154,205 | 129,165,535 | chr18 | 60,893,036  | 60,927,046  |
| chr9  | 33,221,315  | 33,234,439  | chr19 | 35,806,914  | 35,810,241  |
| chr9  | 97,754,320  | 97,766,484  | chr20 | 35,893,182  | 35,908,232  |
| chr10 | 134,376     | 173,195     | chr20 | 52,720,726  | 52,743,946  |
| chr10 | 127,313,412 | 127,323,049 | chr21 | 41,690,518  | 41,712,592  |
| chr11 | 1,849,851   | 1,850,069   | chr21 | 43,795,659  | 43,813,118  |
| chr11 | 69,330,109  | 69,330,327  | chr21 | 46,806,706  | 46,841,893  |
| chr11 | 72,903,470  | 72,911,612  | chr22 | 29,209,791  | 29,220,052  |
| chr11 | 77,856,839  | 77,867,681  | chr22 | 37,574,422  | 37,594,098  |
